# Supplementary material for: Supplementation with Serum-Derived Extracellular Vesicles Reinforces Antitumor Immunity Induced by Cryo-Thermal Therapy
Source: MDPI journal article supplement (doi:10.3390/ijms222011021), 2021-10-13
Supplement: s1 [file s1]

# Supplementary Materials: Supplementation with serum-derived extracellular vesicles reinforces antitumor immunity induced by cryo-thermal therapy

Yinuo Cen <sup>1,2</sup>, Yue Lou <sup>1,2</sup>, Junjun Wang <sup>1,2</sup>, Shicheng Wang <sup>1,2</sup>, Peng Peng <sup>1,2</sup>, Aili Zhang <sup>1,2</sup> and Ping Liu <sup>1,2,\*</sup>

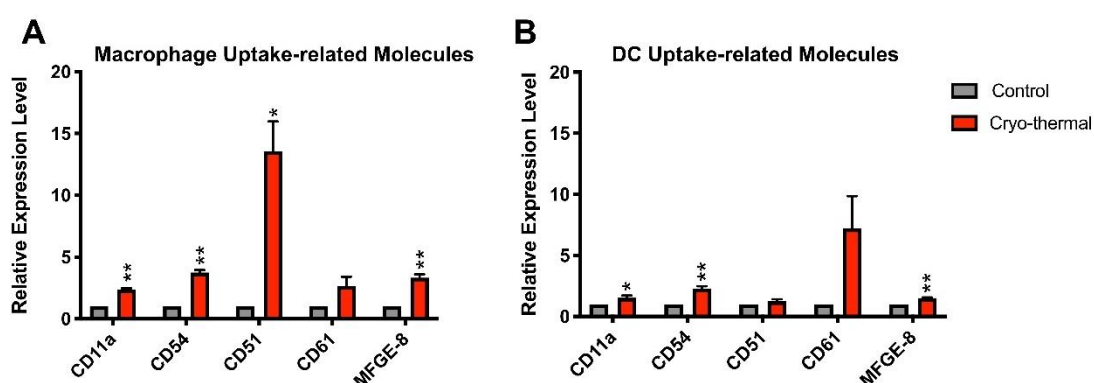

**Supplementary Figure S1** The up-regulated expression of EV uptake-related genes in spleen macrophages and DCs on day 3 after cryo-thermal therapy in 4T1 subcutaneous tumor model. Total RNA of spleen macrophages and DCs were isolated on day 3 after treatment. RT-qPCR was used to detect mRNA levels of EV phagocytosis-related protein of macrophages (A) and DCs (B) on day 3 after treatment. Data were shown as mean±SD, and the student's t-test was used for statistical analysis. n = 4, \*  $p < 0.05$ , \*\*  $p < 0.01$  compared with the control group.

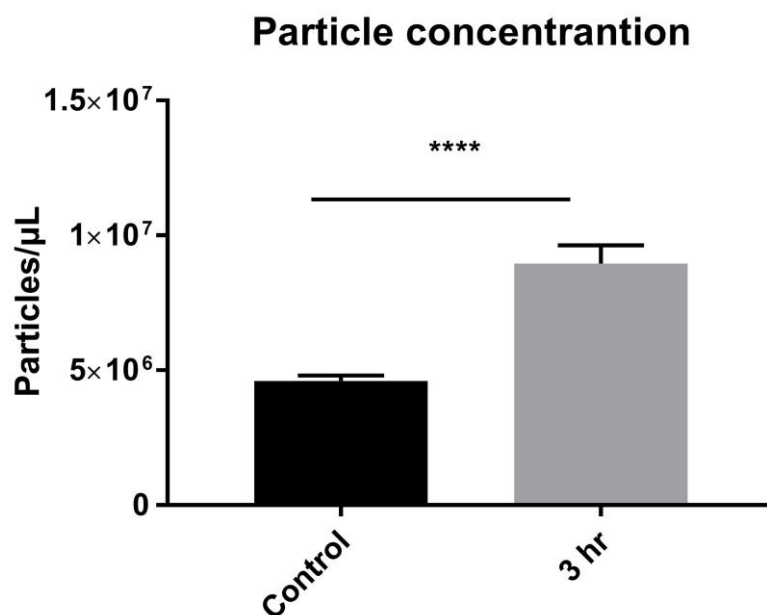

**Supplementary Figure S2** Cryo-thermal therapy induced the release of sEVs. sEVs concentration (standardized by serum volume) 3hr after cryo-thermal therapy were measured by Nanoparticle Tracking Analysis (NTA). Data were shown as mean±SD, and the student's t-test was used for statistical analysis.  $n = 5$ , \*\*\*\*  $p < 0.0001$  compared with the control group.

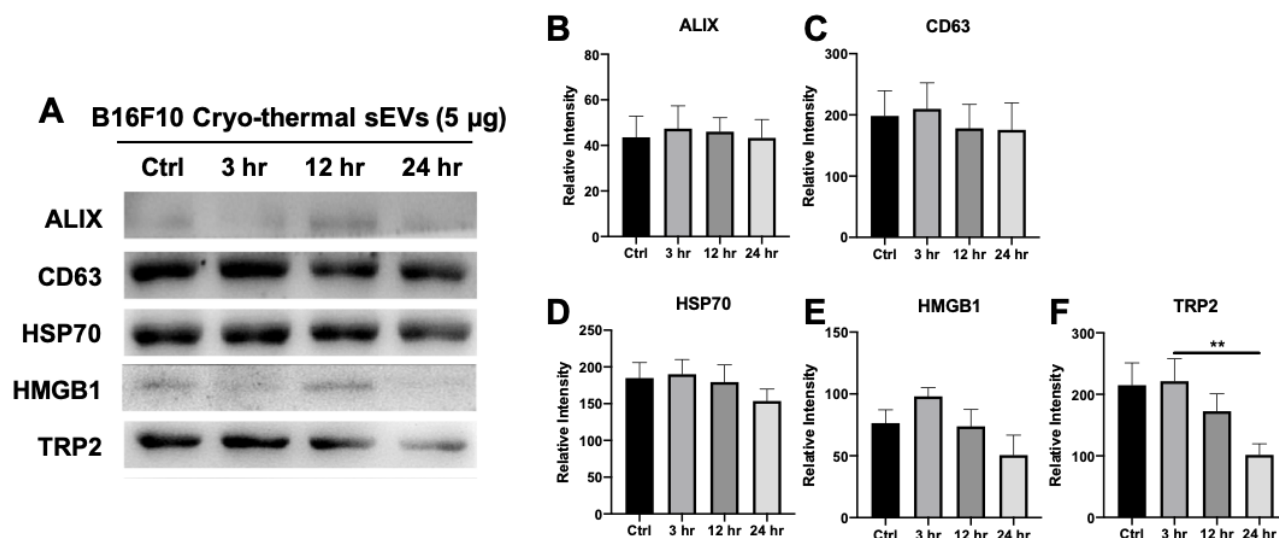

**Supplementary Figure S3** Western blotting of sEVs (5  $\mu$ g) from the serum in B16F10 model at 3, 12, and 24 hr after cryo-thermal therapy with individual densitometry analysis. ALIX, CD63: Exosomal protein markers; HSP70, HMGB1: danger signal; TRP2: known B16 tumor antigen. Data were shown as mean $\pm$ SD, and the student's t-test was used for statistical analysis.  $n = 3$ , \*\*  $p < 0.01$ .

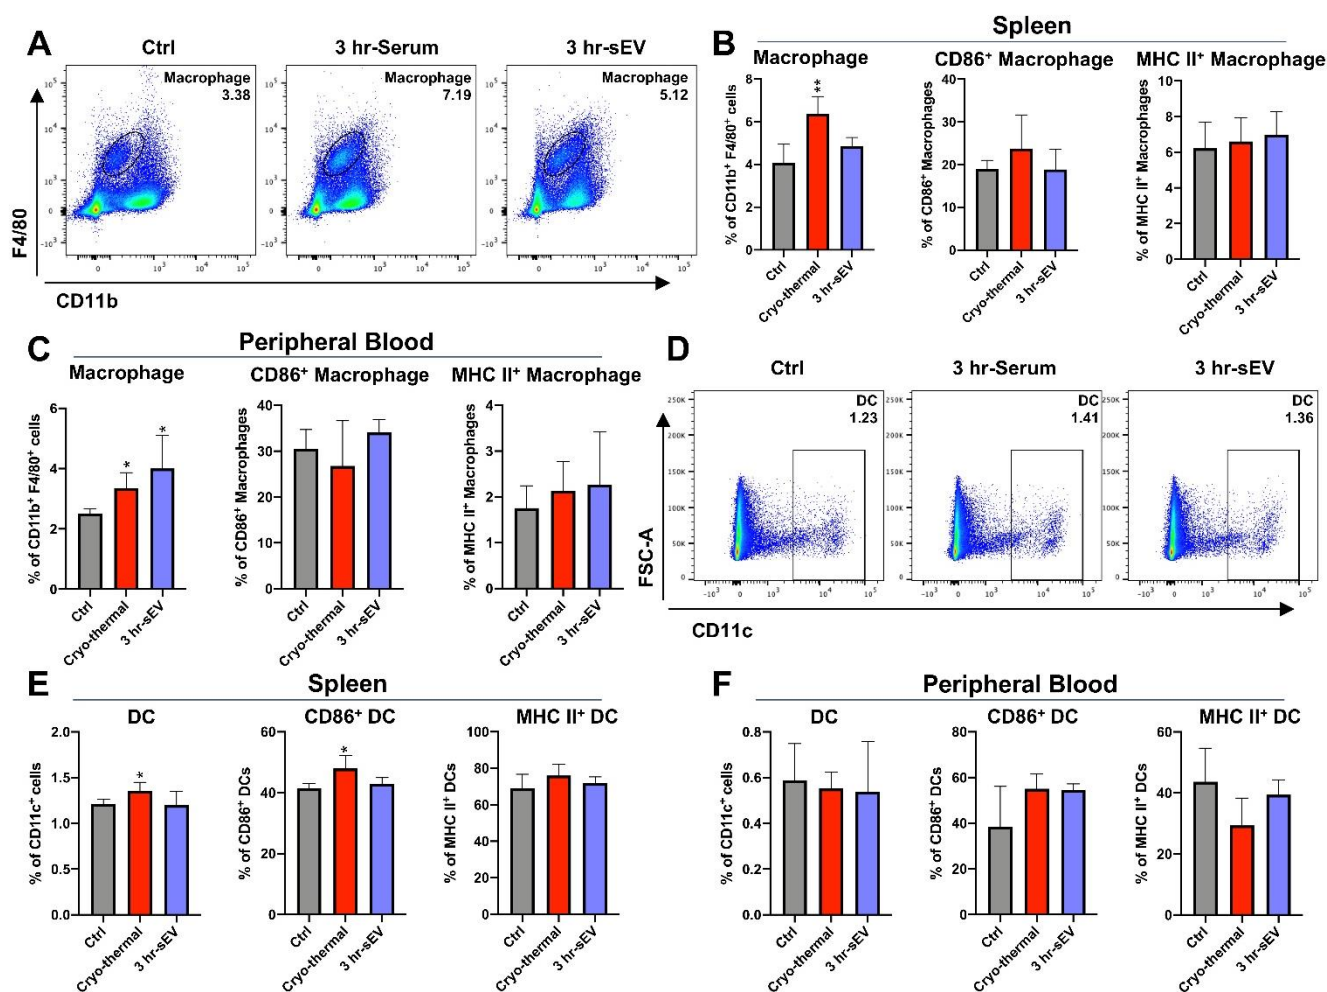

**Supplementary Figure S4** Supplement of sEVs after cryo-thermal therapy upregulated the proportion of macrophages and DCs. (A) Flow cytometry gating strategy for the determination of CD11b<sup>+</sup> F4/80<sup>+</sup> macrophages. (B–C) Proportions of macrophages, CD86<sup>+</sup> macrophages, and MHC II<sup>+</sup> macrophages in spleen (B) and peripheral blood (C) were determined by using flow cytometry (n = 4 per group). (D) Flow cytometry gating strategy for the determination of CD11c<sup>+</sup> DCs. (E–F) Proportions of DCs, CD86<sup>+</sup> DCs, and MHC II<sup>+</sup> DCs in spleen (E) and peripheral blood (F) were determined by using flow cytometry (n = 4 per group). Data were shown as mean ± SD, and the student's t-test was used for statistical analysis. \*  $p < 0.05$ , \*\*  $p < 0.01$  compared with the control group.

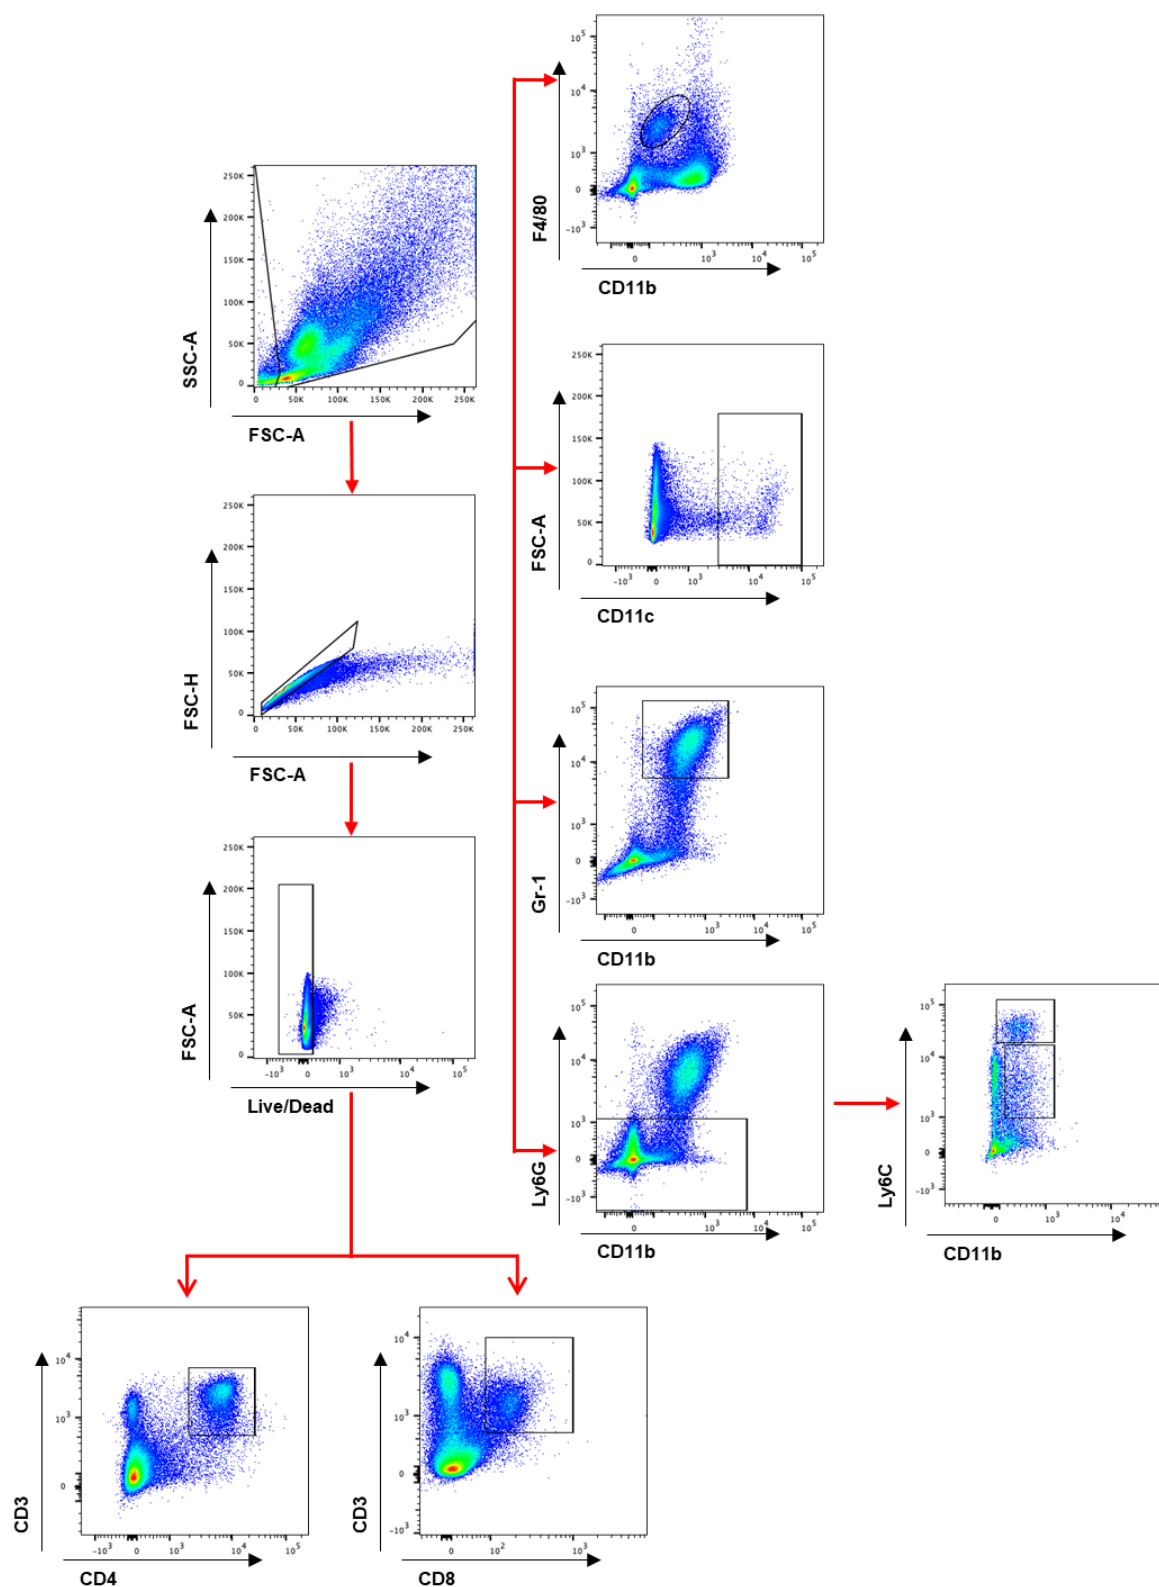

**Supplementary Figure S5** Flow cytometry gating strategy for the determination of CD11b<sup>+</sup> F4/80<sup>+</sup> macrophages, CD11c<sup>+</sup> DCs, CD11b<sup>+</sup> Gr1<sup>+</sup> MDSCs, CD11b<sup>+</sup> Ly6G<sup>+</sup> Ly6C<sup>+</sup> Monocytes, CD3<sup>+</sup> CD4<sup>+</sup> T cells and CD3<sup>+</sup> CD8<sup>+</sup> T cells in vivo analyses.

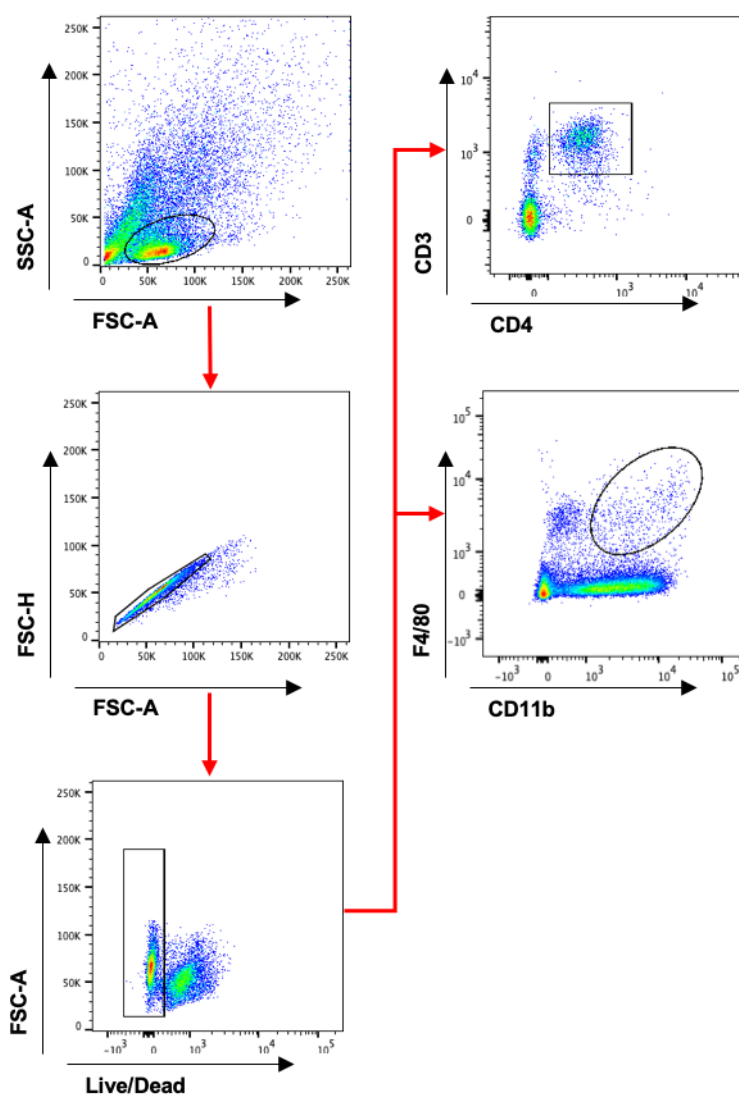

**Supplementary Figure S6** Flow cytometry gating strategy for the determination of CD11b<sup>+</sup> F4/80<sup>+</sup> macrophages and CD3<sup>+</sup> CD4<sup>+</sup> T cells in in vitro analyses.
